# Supplementary material for: A rapid and colorimetric biosensor based on GR-5 DNAzyme and self-replicating catalyzed hairpin assembly for lead detection
Source: Royal Society of Chemistry journal article supplement (doi:10.1039/d0ay00091d), 2020-01-01
Supplement: d0ay00091d1.pdf [file d0ay00091d1.pdf]

## Supporting Information

Rapid and colorimetric biosensor based on GR-5 DNAzyme and self-replicating catalyzed hairpin assembly for lead detection

Fang Wang,<sup>a</sup> Jianyuan Dai,<sup>\*b</sup> Hongli Shi,<sup>b</sup> Xiaoqian Luo,<sup>b</sup> Lan Xiao,<sup>b</sup> Cuisong Zhou,<sup>b</sup> Yong Guo,<sup>b</sup> and Dan Xiao<sup>\*ab</sup>

<sup>a</sup> College of Chemical Engineering, Sichuan University, Chengdu 610065, China

<sup>b</sup> College of Chemistry, Sichuan University, Chengdu 610064, China

**Table S1: The sequences of DNA used in the experiments.**

| DNA name         | DNA sequence (5' to 3')                                                                             |
|------------------|-----------------------------------------------------------------------------------------------------|
| Substrate strand | <u>TCCTCGTATGTTTTGGGTTGGATCACTA</u> TrAGGAAGAGATGATG<br>TCTGT                                       |
| Enzyme strand    | ACAGACATCATCTCTGAAGTAGCGCCGCCGTATAGTGAT                                                             |
| H1               | <u>TCCTCGTATGTTTTGT</u> AGTGATCCAACCCAAAACATACGAGGAT<br>CACTAGGTTGGATCGTATGTTT <u>TGGGTTGGGCGGG</u> |
| H2               | <u>TGGGT</u> TAAACATACGATCCAACCTAGTGATCCTCGTATGTTTTG<br>GGTGGATCACTA <u>GGTTGGATCACTA</u>           |
| H1C              | <u>TTTTTTTTTTTTTTT</u> TAGTGATCCAACCCAAAACATACGAGGAT<br>CACTAGGTTGGATCGTATGTTTTGGGTTGGGCGGG         |
| H2C              | TGGGTAAACATACGATCCAACCTAGTGATCCTCGTATGTTTTG<br>GGTGGATCACTA <u>GGTTGGATCTTTT</u>                    |

<sup>a</sup> The blue underlined sequences in substrate strand are the trigger. The blue underlined sequences in H1 and H2 are the two split trigger DNA. The green underlined sequences in H1 and H2 are the two split G-quadruplex sequences. The pink underlined sequences in H1C and H2C are the two thymine-rich sequences which were used to replace the two split trigger DNA sequences.

**Table S2: Different signal approaches for Pb<sup>2+</sup> detection.**

| Strategy                                                | Signal readout         | Detection limit | Detection time | Ref.      |
|---------------------------------------------------------|------------------------|-----------------|----------------|-----------|
| G-quadruplex/DNAzyme                                    | Colorimetric detection | 10 nM           | 16 h           | [1]       |
| Lead(II)-induced allosteric G-quadruplex DNAzyme        | Colorimetric detection | 32 nM           | 100 min        | [2]       |
| Cationic-perylene-G-quadruplex complex                  | Fluorescence detection | 5 nM            | 50 min         | [3]       |
| Gold nanoparticles/dsDNA/exonuclease I                  | Colorimetric detection | 2.4 nM          | 80 min         | [4]       |
| DNA-catalyzed porphyrin metalation/G-quadruplex         | Fluorescence detection | 23.5 nM         | 3 h            | [5]       |
| Gold nanorods/ target-responsive DNA hydrogel           | Colorimetric detection | 13.9 nM         | 2.5 h          | [6]       |
| G-quadruplex/ GR-5 DNAzyme/ ZNPPIX                      | Fluorescence detection | 3 nM            | 190 min        | [7]       |
| DNAzyme cross-linked hydrogel / lead-responsive DNAzyme | Colorimetric detection | 5 nM            | 2.5 h          | [8]       |
| G-Quadruplex/SRCHA                                      | Colorimetric detection | 2.6 nM          | 20 min         | This work |

**Table S3: Recovery experiments of Pb<sup>2+</sup> in river water and serum samples.**

| Sample      | Added/nM | Found/nM | Recovery/% | RSD/% |
|-------------|----------|----------|------------|-------|
| River water | 30.0     | 28.7     | 95.7       | 4.1   |
|             | 60.0     | 57.6     | 96.0       | 2.1   |
|             | 90.0     | 93.9     | 104.3      | 2.4   |
| Serum       | 30.0     | 32.5     | 108.3      | 3.7   |
|             | 60.0     | 63.1     | 105.2      | 2.3   |
|             | 90.0     | 88.7     | 98.6       | 2.9   |

#### References

- [1] X. Zhu, X. Gao, Q. Liu, Z. Liu, B. Qiu, G. Chen, *Chem. Commun*, 2011, 47, 7437–7439.
- [2] T. Li, E. Wang, S. Dong, *Anal. Chem*, 2010, 82, 1515–1520.
- [3] X. H. Zhao, L. Gong, Y. Wu, X. B. Zhang, J. Xie, *Talanta*, 2016, 149, 98–102.
- [4] M. Shahdordizadeh, R. Yazdian-Robati, N. Ansari, M. Ramezani, K. Abnous, S. M. Taghdisi, *Microchimica Acta*, 2018, 185, 151.
- [5] D. Peng, Y. Li, Z. Huang, R. P. Liang, J. D. Qiu, J. Liu, *Anal. Chem*, 2019, 91, 11403–11408.
- [6] Y. Mao, J. Li, J. Yan, Y. Ma, Y. Song, T. Tian, X. Liu, Z. Zhu, L. Zhou, A. Yang, *Chem. Commun*, 2017, 53, 6375–6378.
- [7] T. Fu, S. Ren, L. Gong, H. Meng, L. Cui, R. M. Kong, X. B. Zhang, W. Tan, *Talanta*, 2016, 147, 302–306.
- [8] Y. Huang, Y. Ma, Y. Chen, X. Wu, L. Fang, Z. Zhu, C. J. Yang, *Anal. Chem*, 2014, 86, 11434–11439.
